# Supplementary material
Source: PubMed Central journal article supplement (PMC8608719)

**Appendix**  
**Role of Firearm Ownership on 2001–2016 Trends in U.S. Firearm Suicide Rates**  
**Martínez-Alés et al.**

**Appendix Table 1.** Change in Household Firearm Rate and Firearm Suicide Rate by State From 1999–2016

| State | Household firearm ownership rate |       |         | Firearm suicide rate<br>(per 100,000 population) |        |         |
|-------|----------------------------------|-------|---------|--------------------------------------------------|--------|---------|
|       | 1999                             | 2016  | %Δ      | 1999                                             | 2016   | %Δ      |
| AK    | 0.659                            | 0.601 | −8.801  | 10.208                                           | 18.003 | 76.361  |
| AL    | 0.499                            | 0.544 | 9.018   | 11.376                                           | 12.781 | 12.350  |
| AR    | 0.562                            | 0.557 | −0.890  | 9.970                                            | 12.618 | 26.564  |
| AZ    | 0.381                            | 0.331 | −13.123 | 11.021                                           | 12.227 | 10.939  |
| CA    | 0.254                            | 0.156 | −38.583 | 5.236                                            | 4.469  | −14.645 |
| CO    | 0.467                            | 0.387 | −17.131 | 8.430                                            | 12.553 | 48.919  |
| CT    | 0.185                            | 0.204 | 10.270  | 3.817                                            | 3.517  | −7.877  |
| DE    | 0.321                            | 0.405 | 26.168  | 6.688                                            | 7.455  | 11.477  |
| FL    | 0.301                            | 0.276 | −8.306  | 8.092                                            | 8.793  | 8.668   |
| GA    | 0.447                            | 0.363 | −18.792 | 9.147                                            | 9.756  | 6.666   |
| HI    | 0.209                            | 0.139 | −33.493 | 2.240                                            | 3.058  | 36.519  |
| IA    | 0.402                            | 0.427 | 6.219   | 6.251                                            | 8.381  | 34.073  |
| ID    | 0.555                            | 0.598 | 7.748   | 11.203                                           | 14.752 | 31.683  |
| IL    | 0.276                            | 0.224 | −18.841 | 4.518                                            | 4.457  | −1.356  |
| IN    | 0.392                            | 0.440 | 12.245  | 6.931                                            | 10.126 | 46.103  |
| KS    | 0.451                            | 0.452 | 0.222   | 7.132                                            | 10.045 | 40.847  |
| KY    | 0.531                            | 0.556 | 4.708   | 9.339                                            | 12.621 | 35.139  |
| LA    | 0.468                            | 0.553 | 18.162  | 10.089                                           | 10.865 | 7.688   |
| MA    | 0.161                            | 0.101 | −37.267 | 2.143                                            | 2.260  | 5.497   |
| MD    | 0.256                            | 0.150 | −41.406 | 5.338                                            | 4.682  | −12.285 |
| ME    | 0.476                            | 0.533 | 11.975  | 7.991                                            | 9.188  | 14.983  |
| MI    | 0.335                            | 0.407 | 21.493  | 6.276                                            | 8.064  | 28.477  |
| MN    | 0.431                            | 0.428 | −0.696  | 5.481                                            | 6.846  | 24.889  |
| MO    | 0.412                            | 0.558 | 35.437  | 8.671                                            | 11.926 | 37.536  |
| MS    | 0.537                            | 0.570 | 6.145   | 9.977                                            | 10.260 | 2.841   |
| MT    | 0.624                            | 0.677 | 8.494   | 11.762                                           | 17.944 | 52.567  |
| NC    | 0.392                            | 0.396 | 1.020   | 8.243                                            | 8.748  | 6.128   |
| ND    | 0.585                            | 0.564 | −3.590  | 6.590                                            | 11.553 | 75.307  |
| NE    | 0.435                            | 0.438 | 0.690   | 7.550                                            | 6.951  | −7.931  |
| NH    | 0.400                            | 0.502 | 25.500  | 5.968                                            | 9.935  | 66.479  |
| NJ    | 0.134                            | 0.091 | −32.090 | 2.635                                            | 2.208  | −16.180 |
| NM    | 0.470                            | 0.358 | −23.830 | 11.580                                           | 13.070 | 12.865  |
| NV    | 0.418                            | 0.324 | −22.488 | 15.377                                           | 12.662 | −17.656 |
| NY    | 0.197                            | 0.158 | −19.797 | 2.586                                            | 2.801  | 8.310   |
| OH    | 0.336                            | 0.439 | 30.655  | 6.281                                            | 8.973  | 42.844  |
| OK    | 0.512                            | 0.594 | 16.016  | 10.728                                           | 14.918 | 39.049  |
| OR    | 0.491                            | 0.391 | −20.367 | 10.305                                           | 11.083 | 7.544   |
| PA    | 0.372                            | 0.426 | 14.516  | 6.567                                            | 8.526  | 29.826  |
| RI    | 0.157                            | 0.158 | 0.637   | 3.964                                            | 3.487  | −12.027 |
| SC    | 0.442                            | 0.468 | 5.882   | 8.356                                            | 12.009 | 43.719  |
| SD    | 0.527                            | 0.598 | 13.472  | 8.750                                            | 11.252 | 28.593  |

**Appendix**  
**Role of Firearm Ownership on 2001–2016 Trends in U.S. Firearm Suicide Rates**  
**Martínez-Alés et al.**

|    |       |       |         |        |        |         |
|----|-------|-------|---------|--------|--------|---------|
| TN | 0.486 | 0.491 | 1.029   | 10.181 | 11.405 | 12.018  |
| TX | 0.413 | 0.343 | −16.949 | 7.014  | 8.336  | 18.853  |
| UT | 0.454 | 0.433 | −4.626  | 8.459  | 12.248 | 44.790  |
| VA | 0.403 | 0.330 | −18.114 | 8.170  | 8.832  | 8.093   |
| VT | 0.486 | 0.539 | 10.905  | 8.478  | 11.328 | 33.608  |
| WA | 0.386 | 0.335 | −13.212 | 8.785  | 7.906  | −10.005 |
| WI | 0.444 | 0.489 | 10.135  | 6.306  | 8.850  | 40.341  |
| WV | 0.578 | 0.632 | 9.343   | 10.410 | 14.747 | 41.664  |
| WY | 0.596 | 0.650 | 9.060   | 13.350 | 16.956 | 27.006  |

*Notes:*  $\Delta$  denotes percent change between 1999 and 2016. Firearm suicide rates are restricted to population aged 10–84 years. Household firearm rate represents the average proportion of adults living in households with a firearm. In 1999, Nevada (15.4 per 100,000) and Massachusetts (2.1 per 100,000) had, respectively, the highest and lowest firearm suicide mortality rates. In 2016, the highest firearm suicide mortality rate corresponded with Alaska, at 18.0 per 100,000, and the lowest with New Jersey, at 2.2 per 100,000. Between 1999–2016, the largest increase and decrease in firearm suicide mortality corresponded, respectively, with Alaska (+7.8 per 100,000) and Nevada (−2.7 per 100,000). In 1999, household firearm ownership rate was highest in Alaska (0.66). In 2016, it was highest in Montana (0.68). In both years, New Jersey had the lowest household firearm ownership rate (0.13 in 1999 and 0.09 in 2016). Between 1999 and 2016, firearm ownership increased the most in Missouri (rate variation: +0.15) and decreased the most in Maryland (rate variation: −0.11).

**Appendix**  
**Role of Firearm Ownership on 2001–2016 Trends in U.S. Firearm Suicide Rates**  
 Martínez-Alés et al.

**Appendix Figure 1.**

Firearm suicide rate and household firearm ownership by state: 1999 - 2016

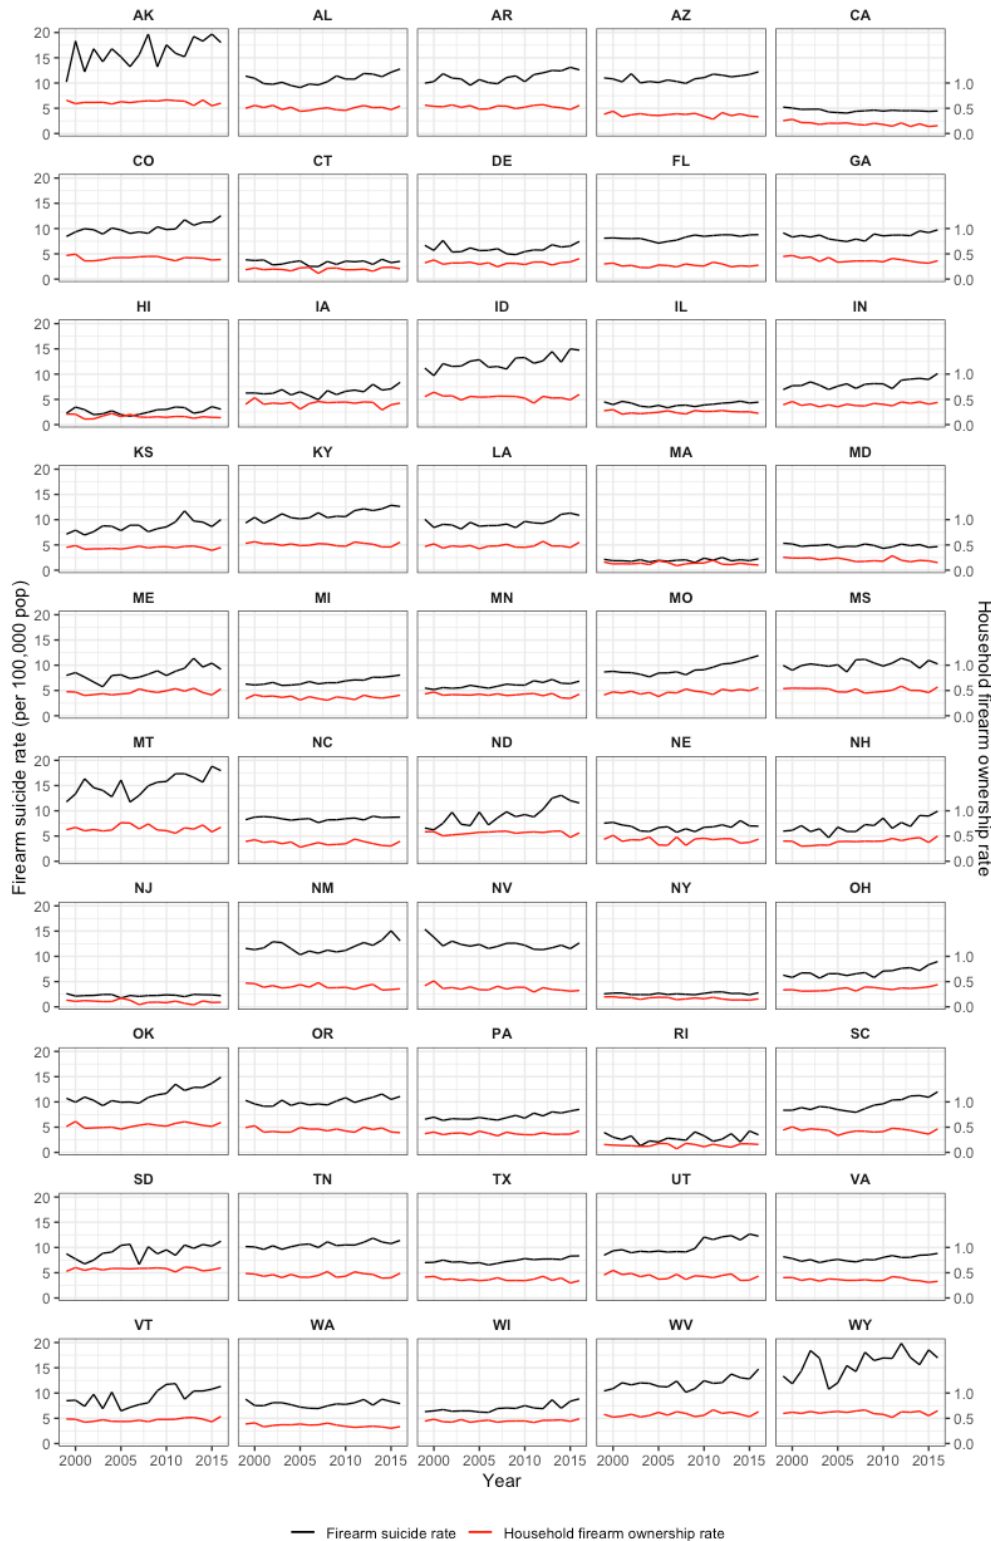

*Note:* Firearm suicide rates are restricted to population aged 10–84 years. Household firearm rate represents the average proportion of adults living in households with a firearm.

**Appendix**  
**Role of Firearm Ownership on 2001–2016 Trends in U.S. Firearm Suicide Rates**  
**Martínez-Alés et al.**

**Appendix Figure 2.** Cohort effects on firearm suicide in the U.S. from 2001 to 2016, from hierarchical age-period-cohort models adjusted by individual-level age, sex, and race/ethnicity and state-level annual poverty rate, annual unemployment rate, annual median household income in 2014 U.S. dollars, population density, and median elevation. State-level household firearm ownership rate included as a continuous variable.

Cohort Coefficients

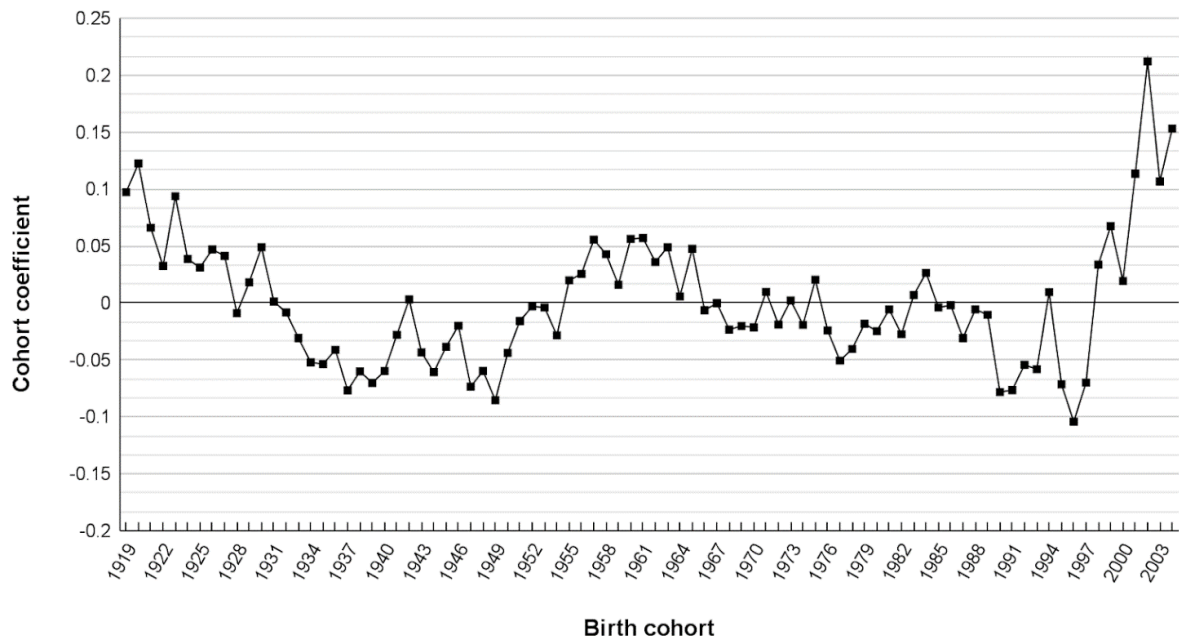

**Appendix**  
**Role of Firearm Ownership on 2001–2016 Trends in U.S. Firearm Suicide Rates**  
**Martínez-Alés et al.**

**Appendix Figure 3.** Period effects on firearm suicide in the U.S. from 2001 to 2016, from hierarchical age-period-cohort models adjusted by individual-level age, sex, and race/ethnicity and state-level annual poverty rate, annual unemployment rate, annual median household income in 2014 U.S. dollars, population density, and median elevation. State-level household firearm ownership rate included as a continuous variable.

Period Coefficients

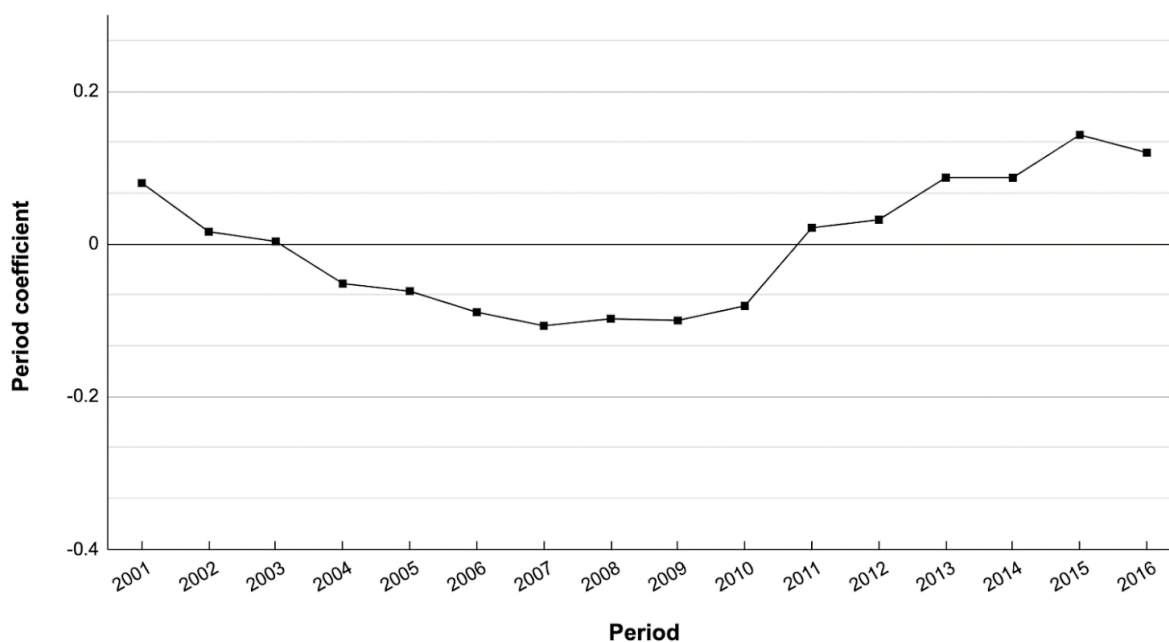

**Appendix**  
**Role of Firearm Ownership on 2001–2016 Trends in U.S. Firearm Suicide Rates**  
**Martínez-Alés et al.**

**Appendix Figure 4.** Cohort effects on firearm suicide in the U.S. from 2001 to 2018, from hierarchical age-period-cohort models adjusted by individual-level age, sex, and race/ethnicity and state-level annual poverty rate, annual unemployment rate, annual median household income in 2014 U.S. dollars, population density, and median elevation.

Cohort Coefficients

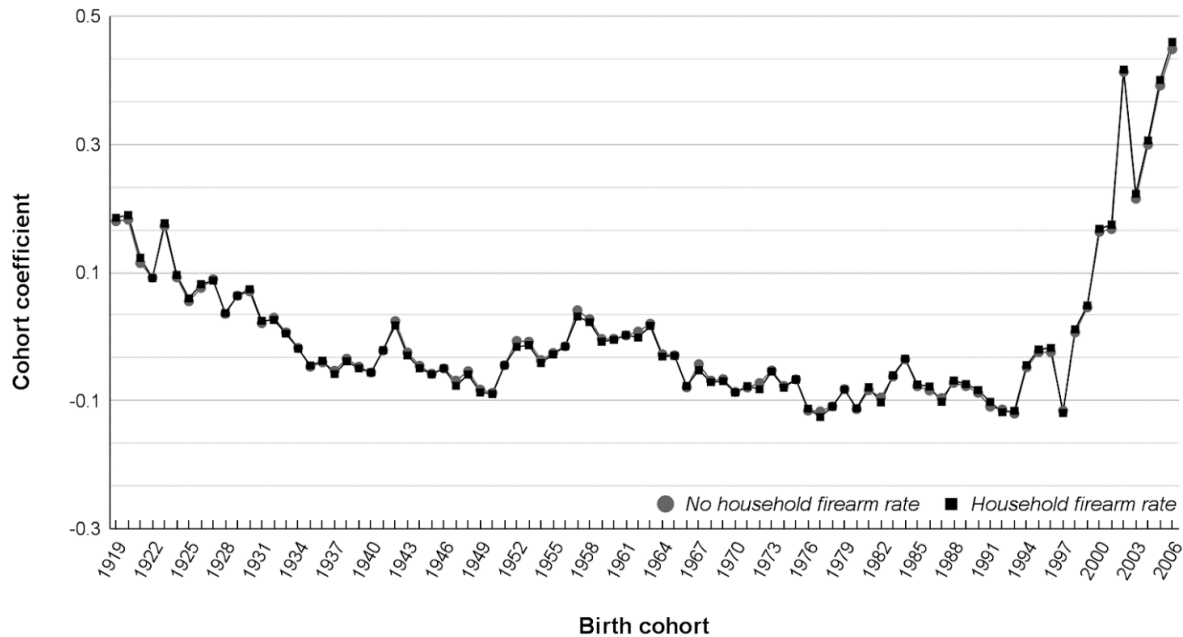

**Appendix**  
**Role of Firearm Ownership on 2001–2016 Trends in U.S. Firearm Suicide Rates**  
**Martínez-Alés et al.**

**Appendix Figure 5.** Period effects on firearm suicide in the U.S. from 2001 to 2018, from hierarchical age-period-cohort models adjusted by individual-level age, sex, and race/ethnicity and state-level annual poverty rate, annual unemployment rate, annual median household income in 2014 U.S. dollars, population density, and median elevation.

Period Coefficients

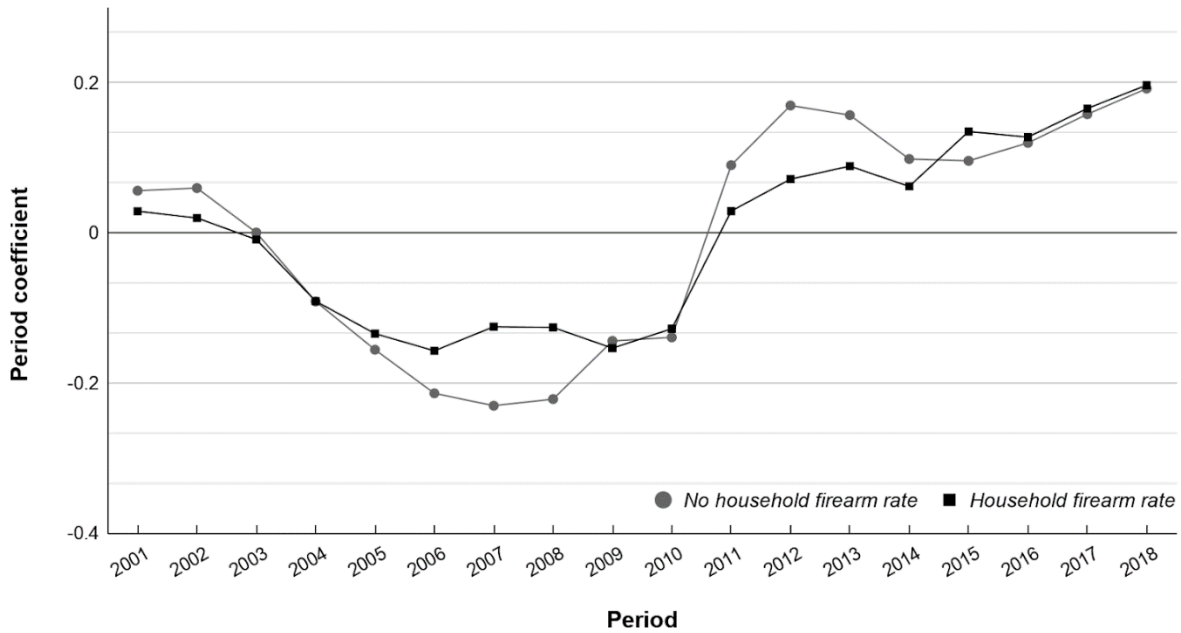

Supplement: NIHMS1731572-supplement-1.pdf [file NIHMS1731572-supplement-1.pdf]
